# EXPRESSION OF CONCERN

## Expression of Concern: Survivability and behavior of probiotic bacteria encapsulated by internal gelation in non-dairy matrix and *In Vitro* GIT conditions

The *PLOS One* Editors

The *PLOS One* Editors issue this Expression of Concern to inform readers that issues came to light regarding the article's peer review and compliance with the PLOS Authorship policy which call into question the reliability and provenance of the research reported in this article [1].

### Reference

1. Nazir S, Afzaal M, Saeed F, Ahmad A, Ateeq H, Ikram A, et al. Survivability and behavior of probiotic bacteria encapsulated by internal gelation in non-dairy matrix and In Vitro GIT conditions. *PLoS One*. 2024;19(6):e0303091. <https://doi.org/10.1371/journal.pone.0303091> PMID: [38905169](https://pubmed.ncbi.nlm.nih.gov/38905169/)

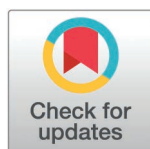

### OPEN ACCESS

**Citation:** The *PLOS One* Editors (2025) Expression of Concern: Survivability and behavior of probiotic bacteria encapsulated by internal gelation in non-dairy matrix and *In Vitro* GIT conditions. *PLoS One* 20(7): e0327231. <https://doi.org/10.1371/journal.pone.0327231>

**Published:** July 1, 2025

**Copyright:** © 2025 The *PLOS One* Editors. This is an open access article distributed under the terms of the [Creative Commons Attribution License](https://creativecommons.org/licenses/by/4.0/), which permits unrestricted use, distribution, and reproduction in any medium, provided the original author and source are credited.
